# Supplementary material for: Development of NMDAR Antagonists with Reduced Neurotoxic Side Effects: a Study on GK11
Source: PubMed Central journal article supplement (PMC3834252; doi:10.1371/journal.pone.0081004), 2013-11-19
Supplement: pone.0081004.s001.pdf [file pone.0081004.s001.pdf]

| Family                                                        | Symbol         | Entrez Gene Name                                                    | Affymetrix        | Fold Chge GK11 | Fold Chge MK801 | Type(s) IPA classification | Location                   |
|---------------------------------------------------------------|----------------|---------------------------------------------------------------------|-------------------|----------------|-----------------|----------------------------|----------------------------|
| <b>Genes deregulated after both MK801 and GK11 treatments</b> |                |                                                                     |                   |                |                 |                            |                            |
| Cellular processes -Death                                     | CAPN8          | calpain 8                                                           | 1387991_at        | 1,66           | ↘               | endopeptidase              | Cytoplasm                  |
| Cellular processes - Proliferation                            | CSH1           | chorionic somatomammotropin hormone 1                               | 1367587_at        | 1,45           | ↘               | growth factor              | Extracellular Space        |
| Cellular processes -Death                                     | BOK            | BCL2-related ovarian killer                                         | 1369084_a_at      | 1,88           | ↘               | other                      | unknown                    |
| Cellular processes -Death                                     | SLC2A3         | solute carrier family 2 (facilitated glucose transporter), member 3 | 1387707_at        | ↘              | 2,33            | transporter                | Plasma Membrane            |
| Cellular processes -Growth                                    | RET            | ret proto-oncogene                                                  | 1370989_at        | 1,76           | 1,96            | kinase                     | Plasma Membrane            |
| Cellular processes -Death                                     | HOMER1         | homer homolog 1 (Drosophila)                                        | 1370454_at        | 2,01           | 2,04            | Scaffolding protein        | Plasma Membrane            |
| Cellular processes -Growth                                    | EPHA5          | EPH receptor A5                                                     | 1371007_at        | -1,42          | -1,86           | kinase                     | Plasma Membrane            |
| Cellular processes -Growth                                    | TPM1           | tropomyosin 1 (alpha)                                               | 1370513_at        | -1,65          | -1,57           | other                      | Cytoplasm                  |
| Cellular processes -Death                                     | HK1            | hexokinase 1                                                        | Rat_Hexokinase    | ↘              | -1,70           | kinase                     | Cytoplasm                  |
| Cellular processes -Death                                     | AMBRA1         | autophagy/beclin-1 regulator 1                                      | 1369601_at        | ↘              | ↘               | other                      | unknown                    |
| Cellular processes -Growth                                    | CA3            | carbonic anhydrase III, muscle specific                             | 1367896_at        | ↘              | -1,95           | enzyme                     | Cytoplasm                  |
| Cellular processes - Death                                    | TGM2           | transglutaminase 2                                                  | 1369943_at        | ↗              | ↗               | enzyme                     | Cytoplasm                  |
| Cytoskeleton                                                  | CELSR2         | cadherin, EGF LAG seven-pass G-type receptor 2 (flamingo family)    | 1371018_at        | 1,49           | 1,50            | G-protein coupled receptor | Plasma Membrane            |
| Cytoskeleton                                                  | NEXN           | nexilin (F actin binding protein)                                   | 1370697_a_at      | ↘              | ↘               | other                      | Plasma Membrane            |
| Cytoskeleton                                                  | TMOD1          | tropomodulin 1                                                      | 1387370_at        | ↘              | ↘               | enzyme                     | Cytoplasm                  |
| Extracellular matrix                                          | DSPP           | dentin sialophosphoprotein                                          | 1368743_a_at      | ↘              | 1,92            | other                      | Extracellular Space        |
| Extracellular matrix                                          | LOX            | lysyl oxidase                                                       | 1368171_at        | 2,33           | 2,01            | enzyme                     | Extracellular Space        |
| Extracellular matrix                                          | FXD5           | FXD domain containing ion transport regulator 5                     | 1368207_at        | 2,08           | 2,20            | ion channel                | Plasma Membrane            |
| Extracellular matrix                                          | COL5A1         | collagen, type V, alpha 1                                           | 1369955_at        | ↘              | ↘               | other                      | Extracellular Space        |
| <b>Extracellular matrix</b>                                   | <b>COL18A1</b> | <b>collagen, type XVIII, alpha 1</b>                                | <b>1388143_at</b> | <b>↘</b>       | <b>↘</b>        | <b>other</b>               | <b>Extracellular Space</b> |
| Extracellular matrix                                          | IBSP           | integrin-binding sialoprotein                                       | 1368416_at        | ↗              | ↗               | other                      | Extracellular Space        |
| Response to drug / stress                                     | ABCB1          | ATP-binding cassette, sub-family B (MDR/TAP), member 1              | 1370464_at        | -1,98          | -2,09           | transporter                | Plasma Membrane            |
| <b>Response to drug / stress</b>                              | <b>HSPA1B</b>  | <b>heat shock 70kDa protein 1B</b>                                  | <b>1368247_at</b> | <b>5,85</b>    | <b>18,35</b>    | <b>stress markers</b>      | <b>Cytoplasm</b>           |
| <b>Response to drug / stress</b>                              | <b>HSPA1A</b>  | <b>heat shock 70kDa protein 1A</b>                                  | <b>1370912_at</b> | <b>3,68</b>    | <b>5,09</b>     | <b>stress markers</b>      | <b>Cytoplasm</b>           |
| Response to stress / drug                                     | ITIH4          | inter-alpha (globulin) inhibitor H4                                 | 1368707_at        | ↗              | ↗               | other                      | Extracellular Space        |
| Response to stress / drug                                     | RGD:708417     | UDP glucuronosyltransferase 2 family, polypeptide B7                | 1370615_at        | ↗              | ↗               | enzyme                     | Cytoplasm                  |
| Immune response / Inflammation                                | GBP2           | guanylate binding protein 2, interferon-inducible                   | 1368332_at        | 1,52           | ↘               | enzyme                     | Cytoplasm                  |
| Immune response / Inflammation                                | TRIB1          | tribbles homolog 1 (Drosophila)                                     | 1371019_at        | ↘              | 1,63            | kinase                     | Cytoplasm                  |
| <b>Immune response / Inflammation</b>                         | <b>BDNF</b>    | <b>brain-derived neurotrophic factor</b>                            | <b>1368677_at</b> | <b>→</b>       | <b>2,30</b>     | <b>growth factor</b>       | <b>Extracellular Space</b> |
| <b>Immune response / Inflammation</b>                         | <b>BDNF</b>    | <b>brain-derived neurotrophic factor</b>                            | <b>1368678_at</b> | <b>1,79</b>    | <b>→</b>        | <b>growth factor</b>       | <b>Extracellular Space</b> |
| Immune response / Inflammation                                | THBD           | thrombomodulin                                                      | 1368901_at        | 2,00           | 2,53            | transmembrane receptor     | Plasma Membrane            |
| Immune response / Inflammation                                | CRH            | corticotropin releasing hormone                                     | 1369303_at        | 2,15           | 2,28            | stress markers             | Extracellular Space        |
| Immune response / Inflammation                                | SLCO1A2        | solute carrier organic anion transporter family, member 1A2         | 1387093_at        | -1,94          | -2,09           | transporter                | Plasma Membrane            |
| Immune response / Inflammation                                | TNFRSF11B      | tumor necrosis factor receptor superfamily, member 11b              | 1369407_at        | -1,71          | -2,24           | transmembrane receptor     | Plasma Membrane            |
| Immune response / Inflammation                                | SLC15A3        | solute carrier family 15, member 3                                  | 1370516_at        | ↘              | ↘               | transporter                | unknown                    |
| Immune response / Inflammation                                | IL3RA          | interleukin 3 receptor, alpha (low affinity)                        | 1387935_at        | ↘              | ↘               | transmembrane receptor     | Plasma Membrane            |

| Family                                | Symbol        | Entrez Gene Name                                              | Affymetrix        | Fold Chge<br>GK11 | Fold Chge<br>MK801 | Type(s)<br>IPA classification | Location                   |
|---------------------------------------|---------------|---------------------------------------------------------------|-------------------|-------------------|--------------------|-------------------------------|----------------------------|
| Immune response / Inflammation        | SYK           | spleen tyrosine kinase                                        | 1368186_a_at      | ↗                 | ↗                  | kinase                        | Cytoplasm                  |
| Immune response / Inflammation        | LYN           | v-src-1 Yamaguchi sarcoma viral related oncogene homolog      | 1368679_a_at      | ↗                 | ↗                  | kinase                        | Cytoplasm                  |
| Immune response / Inflammation        | KLRD1         | killer cell lectin-like receptor subfamily D, member 1        | 1369306_at        | ↗                 | ↗                  | transmembrane receptor        | Plasma Membrane            |
| Immune response / Inflammation        | IL9R          | interleukin 9 receptor                                        | 1369359_at        | ↗                 | ↗                  | transmembrane receptor        | Plasma Membrane            |
| <b>Immune response / Inflammation</b> | <b>TNFSF4</b> | <b>tumor necrosis factor (ligand) superfamily, mb4 4</b>      | <b>1369481_at</b> | <b>↗</b>          | <b>↗</b>           | <b>cytokine</b>               | <b>Extracellular Space</b> |
| Immune response / Inflammation        | AZGP1         | alpha-2-glycoprotein 1, zinc-binding                          | 1387234_at        | ↗                 | ↗                  | transporter                   | Extracellular Space        |
| Insulin signalling                    | PCSK1         | proprotein convertase subtilisin/kexin type 1                 | 1387247_at        | 1,66              | 1,78               | peptidase                     | Extracellular Space        |
| Insulin signalling                    | SCNN1G        | sodium channel, nonvoltage-gated 1, gamma                     | 1387986_at        | ↘                 | ↘                  | ion channel                   | Plasma Membrane            |
| Lipid metabolism                      | CD36          | CD36 molecule (thrombospondin receptor)                       | 1367689_a_at      | 2,62              | ↘                  | transmembrane receptor        | Plasma Membrane            |
| Lipid metabolism                      | CBR1          | carbonyl reductase 1                                          | 1368037_at        | 1,60              | 1,61               | enzyme                        | Cytoplasm                  |
| Lipid metabolism                      | PLA1A         | phospholipase A1 member A                                     | 1370445_at        | 1,94              | 2,10               | enzyme                        | Extracellular Space        |
| Lipid metabolism                      | VLDLR         | very low density lipoprotein receptor                         | 1387455_a_at      | -1,53             | -1,64              | transporter                   | Plasma Membrane            |
| Lipid metabolism                      | APOC1         | apolipoprotein C-I                                            | 1368587_at        | ↘                 | ↘                  | transporter                   | Extracellular Space        |
| Lipid metabolism                      | ACADSB        | acyl-Coenzyme A dehydrogenase, short/branched chain           | 1369526_at        | ↘                 | ↘                  | enzyme                        | Cytoplasm                  |
| Lipid metabolism                      | EBP           | emopamil binding protein (sterol isomerase)                   | 1386990_at        | ↘                 | ↘                  | enzyme                        | Cytoplasm                  |
| Lipid metabolism                      | THRSP         | thyroid hormone responsive (SPOT14 homolog, rat)              | 1387852_at        | ↗                 | ↗                  | other                         | Nucleus                    |
| Lipid metabolism                      | LEPR          | leptin receptor                                               | 1388260_a_at      | ↗                 | ↗                  | transmembrane receptor        | Plasma Membrane            |
| Transcription factors                 | VAV1          | vav 1 guanine nucleotide exchange factor                      | 1369387_at        | 1,82              | ↘                  | transcription regulator       | Nucleus                    |
| Transcription factors                 | JUN           | jun oncogene                                                  | 1369788_s_at      | 1,48              | 1,71               | transcription regulator       | Nucleus                    |
| Transcription factors                 | SMAD1         | SMAD family member 1                                          | 1369174_at        | ↘                 | -2,50              | transcription regulator       | Nucleus                    |
| Transcription factors                 | N5            | DNA binding protein N5                                        | 1369438_at        | ↘                 | -2,19              | transcription regulator       | Nucleus                    |
| Transcription factors                 | NR1D1         | nuclear receptor subfamily 1, group D, member 1               | 1370816_at        | -1,64             | -1,76              | ligand-dependent nuclear rec  | Nucleus                    |
| Transcription factors                 | KHDRBS1       | KH domain containing, RNA binding, signal transduction asso   | 1386896_at        | ↘                 | ↘                  | transcription regulator       | Nucleus                    |
| Transcription factors                 | MTPN          | myotrophin                                                    | 1387786_at        | -1,42             | -1,71              | transcription regulator       | Nucleus                    |
| Transcription factors                 | BMYC          | brain expressed myelocytomatosis oncogene                     | 1388274_at        | ↘                 | ↘                  | other                         | Nucleus                    |
| Transcription factors                 | UNCX4.1       | UNC homeobox                                                  | 1369413_at        | ↗                 | ↗                  | transcription regulator       | unknown                    |
| Transcription factors                 | CREM          | cAMP responsive element modulator                             | 1369737_at        | ↗                 | ↗                  | transcription regulator       | Nucleus                    |
| Cell Signaling                        | HCRT2         | hypocretin (orexin) receptor 2                                | 1369377_at        | ↘                 | ↘                  | G-protein coupled receptor    | Plasma Membrane            |
| Synapse formation                     | DRP2          | dystrophin related protein 2                                  | 1371224_a_at      | ↘                 | ↘                  | other                         | Plasma Membrane            |
| Others / unknown                      | CLCN4         | chloride channel 4                                            | 1369791_at        | 1,95              | ↘                  | ion channel                   | Plasma Membrane            |
| Others / unknown                      | DCTPP1        | dCTP pyrophosphatase 1                                        | 1370308_at        | ↘                 | 1,80               | enzyme                        | unknown                    |
| Others / unknown                      | SCN7A         | sodium channel, voltage-gated, type VII, alpha                | 1370973_at        | ↘                 | 2,07               | ion channel                   | Plasma Membrane            |
| Others / unknown                      | LOC683655     | similar to ADAM 22 precursor (A disintegrin and metalloprotei | 1385854_at        | 1,67              | 2,04               | endo-peptidase                | unknown                    |
| Others / unknown                      | NLN           | neurolysin (metallopeptidase M3 family)                       | 1369669_at        | -2,13             | -1,91              | metallo-peptidase             | Cytoplasm                  |
| Others / unknown                      | IPMK          | inositol polyphosphate multikinase                            | 1368340_at        | -1,49             | -1,62              | IP kinase                     | Nucleus                    |
| Others / unknown                      | SYNJ1         | synaptojanin 1                                                | 1370070_at        | -1,70             | -1,88              | phosphatase                   | Cytoplasm                  |
| Others / unknown                      | SLCO1C1       | solute carrier organic anion transporter family, member 1C1   | 1370205_at        | -1,58             | -1,63              | transporter                   | Plasma Membrane            |

| Family                                             | Symbol      | Entrez Gene Name                                                       | Affymetrix        | Fold Chge GK11 | Fold Chge MK801 | Type(s) IPA classification | Location                   |
|----------------------------------------------------|-------------|------------------------------------------------------------------------|-------------------|----------------|-----------------|----------------------------|----------------------------|
| Others / unknown                                   | CACNA1H     | calcium channel, voltage-dependent, T type, alpha 1H subunit           | 1368398_at        | ↘              | ↘               | ion channel                | Plasma Membrane            |
| Others / unknown                                   | CLCNKB      | chloride channel Kb                                                    | 1368765_at        | ↘              | ↘               | ion channel                | Plasma Membrane            |
| Others / unknown                                   | SLC38A4     | solute carrier family 38, member 4                                     | 1369074_at        | ↘              | ↘               | transporter                | unknown                    |
| Others / unknown                                   | GOSR2       | golgi SNAP receptor complex member 2                                   | 1370031_at        | ↘              | ↘               | transporter                | Cytoplasm                  |
| Others / unknown                                   | LOC292861   | kallikrein                                                             | 1371080_at        | ↘              | ↘               | endo-peptidase             | unknown                    |
| Others / unknown                                   | AQP6        | aquaporin 6, kidney specific                                           | 1369298_at        | ↗              | ↗               | transporter                | Cytoplasm                  |
| others / unknown                                   | KCNJ3       | potassium inwardly-rectifying channel, subfamily J, member 3           | 1388292_at        | ↗              | ↗               | ion channel                | Plasma Membrane            |
| Others / unknown                                   | CTH         | cystathionase                                                          | 1367838_at        | ↗              | ↗               | enzyme                     | Cytoplasm                  |
| Others / unknown                                   | OLFR995     | olfactory receptor 995                                                 | 1371270_at        | ↘              | ↘               | G-protein coupled receptor | Plasma Membrane            |
| <b>Genes deregulated after GK11 treatment only</b> |             |                                                                        |                   |                |                 |                            |                            |
| Cell signaling                                     | CAMKK2      | calcium/calmodulin-dependent protein kinase kinase 2, beta             | 1368753_at        | -1,74          |                 | kinase                     | Cytoplasm                  |
| Cell signaling                                     | RAB8B       | RAB8B, member RAS oncogene family                                      | 1370539_at        | 1,54           |                 | enzyme                     | Cytoplasm                  |
| Cell signaling                                     | PNCK        | pregnancy up-regulated non-ubiquitously expressed CaM kinase           | 1387281_a_at      | ↗              |                 | kinase                     | Cytoplasm                  |
| Cellular process - Cell Cycle                      | CDC2L1      | cell division cycle 2 homolog (S.pombe)-like 1                         | 1370713_at        | 1,53           |                 | enzyme                     | Cytoplasm                  |
| Cellular process - Death                           | KITLG       | KIT ligand                                                             | 1388096_at        | 1,58           |                 | growth factor              | Extracellular Space        |
| Cellular processes-cell survival                   | PRLR        | prolactin receptor                                                     | 1369493_at        | ↗              |                 | transmembrane receptor     | Plasma Membrane            |
| Cytoskeleton                                       | SLK         | STE20-like kinase (yeast)                                              | 1369037_at        | -1,81          |                 | kinase                     | Nucleus                    |
| Cytoskeleton                                       | RYK         | RYK receptor-like tyrosine kinase                                      | 1371101_at        | 1,63           |                 | kinase                     | Plasma Membrane            |
| Cytoskeleton                                       | ARC         | activity-regulated cytoskeleton-associated protein                     | 1387068_at        | -1,79          |                 | other                      | Cytoplasm                  |
| Cytoskeleton                                       | MLLT4       | myeloid/lymphoid or mixed-lineage leukemia; translocated to, 4         | 1388036_a_at      | ↗              |                 | other                      | Nucleus                    |
| Extracellular matrix                               | ST14        | suppression of tumorigenicity 14 (colon carcinoma)                     | 1387195_at        | ↗              |                 | peptidase                  | Plasma Membrane            |
| Extracellular matrix                               | MEPE        | matrix extracellular phosphoglycoprotein                               | 1387330_at        | ↗              |                 | other                      | Extracellular Space        |
| Extracellular matrix                               | NRG1        | neuregulin 1                                                           | 1388245_a_at      | ↗              |                 | growth factor              | Extracellular Space        |
| Immune response / Inflammation                     | GDF9        | growth differentiation factor 9                                        | 1369121_at        | 1,66           |                 | growth factor              | Extracellular Space        |
| Immune response / Inflammation                     | IL13RA2     | interleukin 13 receptor, alpha 2                                       | 1369266_at        | 1,50           |                 | transmembrane receptor     | Plasma Membrane            |
| Immune response / Inflammation                     | OPRK1       | opioid receptor, kappa 1                                               | 1387102_at        | 1,76           |                 | G-protein coupled receptor | Plasma Membrane            |
| <b>Immune response / Inflammation</b>              | <b>TGFA</b> | <b>transforming growth factor, alpha</b>                               | <b>1387450_at</b> | <b>↘</b>       |                 | <b>growth factor</b>       | <b>Extracellular Space</b> |
| Immune response / Inflammation                     | UCN         | urocortin                                                              | 1387645_at        | 1,57           |                 | other                      | Extracellular Space        |
| Lipid Metabolism                                   | ANXA1       | annexin A1                                                             | 1367614_at        | 1,86           |                 | other                      | Plasma Membrane            |
| Lipid Metabolism                                   | SCD2        | stearoyl-Coenzyme A desaturase 2                                       | 1388253_at        | -1,60          |                 | enzyme                     | Cytoplasm                  |
| Lipid Metabolism                                   | INSIG1      | insulin induced gene 1                                                 | 1367894_at        | -1,44          |                 | other                      | Cytoplasm                  |
| Lipid Metabolism                                   | DGKG        | diacylglycerol kinase, gamma 90kDa                                     | 1387265_at        | 1,75           |                 | kinase                     | Cytoplasm                  |
| Lipid Metabolism                                   | CYP4A14     | cytochrome P450, family 4, subfamily a, polypeptide 14                 | 1370397_at        | ↗              |                 | enzyme                     | Cytoplasm                  |
| Response to stress / Drug                          | C3          | complement component 3                                                 | 1368000_at        | 1,71           |                 | peptidase                  | Extracellular Space        |
| Response to stress / Drug                          | MX1         | myxovirus (influenza virus) resistance 1, interferon-inducible protein | 1369202_at        | 1,98           |                 | enzyme                     | Nucleus                    |
| Response to stress / Drug                          | ABCC1       | ATP-binding cassette, sub-family C (CFTR/MRP), member 1                | 1371005_at        | -1,73          |                 | transporter                | Plasma Membrane            |
| Response to stress / Drug                          | LCN1        | lipocalin 1 (tear prealbumin)                                          | 1387246_at        | 1,80           |                 | transporter                | Extracellular Space        |

| Family                                              | Symbol      | Entrez Gene Name                                                 | Affymetrix        | Fold Chge<br>GK11 | Fold Chge<br>MK801 | Type(s)<br>IPA classification     | Location            |
|-----------------------------------------------------|-------------|------------------------------------------------------------------|-------------------|-------------------|--------------------|-----------------------------------|---------------------|
| Response to stress / Drug                           | MX1         | myxovirus (influenza virus) resistance 1, interferon-inducible p | 1387283_at        | -1,68             |                    | enzyme                            | Nucleus             |
| Response to stress / Drug                           | HSPB1       | heat shock 27kDa protein 1                                       | 1367577_at        | ↗                 |                    | other                             | Cytoplasm           |
| Response to stress / Drug                           | ABCC6       | ATP-binding cassette, sub-family C (CFTR/MRP), member 6          | 1368452_at        | ↗                 |                    | transporter                       | Plasma Membrane     |
| Synaptic transmission                               | PPP1R14A    | protein phosphatase 1, regulatory (inhibitor) subunit 14A        | 1367813_at        | -1,60             |                    | other                             | Cytoplasm           |
| Synaptic transmission                               | CHRM3       | cholinergic receptor, muscarinic 3                               | 1369112_at        | 1,67              |                    | G-protein coupled receptor        | Plasma Membrane     |
| Synaptic transmission                               | LIN7C       | lin-7 homolog C (C. elegans)                                     | 1369610_at        | 1,68              |                    | other                             | Cytoplasm           |
| Synaptic transmission                               | GABRB2      | gamma-aminobutyric acid (GABA) A receptor, beta 2                | 1369818_at        | -1,56             |                    | ion channel                       | Plasma Membrane     |
| Synaptic transmission                               | STXBP1      | syntaxin binding protein 1                                       | 1370518_a_at      | -2,10             |                    | transporter                       | Cytoplasm           |
| Synaptic transmission                               | GRINL1A     | glutamate receptor, ionotropic, N-methyl D-aspartate-like 1A     | 1371051_at        | 1,61              |                    | other                             | Nucleus             |
| Synaptic transmission                               | SLC5A7      | solute carrier family 5 (choline transporter), member 7          | 1387543_at        | 1,89              |                    | transporter                       | Plasma Membrane     |
| Synaptic transmission                               | GABBR1      | gamma-aminobutyric acid (GABA) B receptor, 1                     | 1388030_a_at      | 1,45              |                    | G-protein coupled receptor        | Plasma Membrane     |
| Synaptic transmission                               | CASK        | calcium/calmodulin-dependent serine protein kinase (MAGUK        | 1371177_a_at      | ↗                 |                    | kinase                            | Plasma Membrane     |
| Synaptic transmission                               | GRM8        | glutamate receptor, metabotropic 8                               | 1371242_at        | ↗                 |                    | G-protein coupled receptor        | Plasma Membrane     |
| Transcription factor                                | ANKRD1      | ankyrin repeat domain 1 (cardiac muscle)                         | 1367664_at        | 2,21              |                    | transcription regulator           | Cytoplasm           |
| Transcription factor                                | SIK1        | salt-inducible kinase 1                                          | 1368596_at        | 1,49              |                    | kinase                            | Cytoplasm           |
| Transcription factor                                | THRB        | thyroid hormone receptor, beta (erythroblastic leukemia viral (  | 1387983_at        | 1,46              |                    | ligand-dependent nuclear receptor | Nucleus             |
| Others / Unknown                                    | SCAMP4      | secretory carrier membrane protein 4                             | 1367688_at        | -1,48             |                    | other                             | unknown             |
| Others / Unknown                                    | PRL8A9      | prolactin family8, subfamily a, member 9                         | 1367841_a_at      | 2,24              |                    | other                             | Extracellular Space |
| Others / Unknown                                    | SLC44A1     | solute carrier family 44, member 1                               | 1368480_at        | -1,42             |                    | transporter                       | Plasma Membrane     |
| Others / Unknown                                    | KCNJ5       | potassium inwardly-rectifying channel, subfamily J, member 5     | 1368560_at        | 1,64              |                    | ion channel                       | Plasma Membrane     |
| Others / Unknown                                    | SLC10A1     | solute carrier family 10 (sodium/bile acid cotransporter family) | 1368609_at        | -1,41             |                    | transporter                       | Plasma Membrane     |
| Others / Unknown                                    | FUT9        | fucosyltransferase 9 (alpha (1,3) fucosyltransferase)            | 1369258_at        | -1,41             |                    | enzyme                            | Cytoplasm           |
| Others / Unknown                                    | STXBP3      | syntaxin binding protein 3                                       | 1369414_at        | -1,49             |                    | transporter                       | Plasma Membrane     |
| Others / Unknown                                    | VMN2R28     | vomer nasal 2, receptor 28                                       | 1370664_a_at      | 2,55              |                    | G-protein coupled receptor        | Plasma Membrane     |
| Others / Unknown                                    | SVS1        | seminal vesicle secretory protein 1                              | 1370860_at        | 1,56              |                    | enzyme                            | unknown             |
| Others / Unknown                                    | GPR88       | G protein-coupled receptor 88                                    | 1387241_at        | 1,46              |                    | G-protein coupled receptor        | Plasma Membrane     |
| Others / Unknown                                    | KCNK10      | potassium channel, subfamily K, member 10                        | 1369233_at        | ↗                 |                    | ion channel                       | Plasma Membrane     |
| <b>Genes deregulated after MK801 treatment only</b> |             |                                                                  |                   |                   |                    |                                   |                     |
| Cell signaling                                      | CAMK2D      | calcium/calmodulin-dependent protein kinase II delta             | 1368834_at        |                   | -1,60              | kinase                            | Cytoplasm           |
| Cell signaling                                      | RGS5        | regulator of G-protein signaling 5                               | 1369957_at        |                   | -1,41              | other                             | Plasma Membrane     |
| Cell signaling                                      | PTH1R       | parathyroid hormone 1 receptor                                   | 1370259_a_at      |                   | -1,66              | G-protein coupled receptor        | Plasma Membrane     |
| Cell signaling                                      | DUSP12      | dual specificity phosphatase 12                                  | 1387457_at        |                   | ↗                  | phosphatase                       | Nucleus             |
| <b>Cell signaling</b>                               | <b>AKT3</b> | <b>v-akt murine thymoma viral oncogene homolog 3 (protein</b>    | <b>1387592_at</b> |                   | <b>↗</b>           | <b>kinase</b>                     | <b>Cytoplasm</b>    |
| Cellular processes - Adhesion                       | S1PR1       | sphingosine-1-phosphate receptor 1                               | 1369071_at        |                   | -1,73              | G-protein coupled receptor        | Plasma Membrane     |
| Cellular processes - Adhesion                       | MCAM        | melanoma cell adhesion molecule                                  | 1369793_a_at      |                   | 1,80               | other                             | Plasma Membrane     |
| Cellular processes - Adhesion                       | ST8SIA3     | ST8 alpha-N-acetyl-neuraminide alpha-2,8-sialyltransferase 3     | 1387435_at        |                   | -1,57              | enzyme                            | Cytoplasm           |
| Cellular processes - Growth                         | LSAMP       | limbic system-associated membrane protein                        | 1370550_at        |                   | -1,45              | other                             | Plasma Membrane     |

| Family                                    | Symbol             | Entrez Gene Name                                                                             | Affymetrix        | Fold Chge GK11 | Fold Chge MK801 | Type(s) IPA classification | Location            |
|-------------------------------------------|--------------------|----------------------------------------------------------------------------------------------|-------------------|----------------|-----------------|----------------------------|---------------------|
| Cellular processes - Differentiation      | PROM1              | prominin 1                                                                                   | 1368008_at        |                | -1,70           | other                      | Plasma Membrane     |
| Cellular processes - Differentiation      | CSRP2              | cysteine and glycine-rich protein 2                                                          | 1370282_at        |                | -1,55           | other                      | Nucleus             |
| Cellular processes - Migration            | PDE1C              | phosphodiesterase 1C, calmodulin-dependent 70kDa                                             | 1371219_a_at      |                | 1,82            | enzyme                     | Cytoplasm           |
| Cellular processes-migration              | NTN1               | netrin 1                                                                                     | 1398269_at        |                | ↗               | other                      | Extracellular Space |
| Cellular processes - Proliferation        | GOLPH3             | golgi phosphoprotein 3 (coat-protein)                                                        | 1369571_at        |                | 1,76            | other                      | Cytoplasm           |
| Cellular processes - Proliferation        | TRPC6              | transient receptor potential cation channel, subfamily C, member 6                           | 1370139_a_at      |                | -1,76           | ion channel                | Plasma Membrane     |
| Cellular processes - Proliferation        | GHRHR              | growth hormone releasing hormone receptor                                                    | 1370730_a_at      |                | 1,73            | G-protein coupled receptor | Plasma Membrane     |
| <b>Cellular processes - Proliferation</b> | <b>CCND1</b>       | <b>cyclin D1</b>                                                                             | <b>1371150_at</b> |                | ↘               | <b>other</b>               | <b>Nucleus</b>      |
| Cellular processes - Survival             | AURKAIP1           | aurora kinase A interacting protein 1                                                        | 1398916_at        |                | -1,60           | enzyme                     | Nucleus             |
| Cellular processes - Death                | SCN3A              | sodium channel, voltage-gated, type III, alpha subunit                                       | 1369691_at        |                | -1,54           | ion channel                | Plasma Membrane     |
| Cellular processes -Death                 | DDIT4              | DNA-damage-inducible transcript 4                                                            | 1368025_at        |                | 1,72            | other                      | Cytoplasm           |
| Cellular processes -Death                 | ADCY8              | adenylate cyclase 8 (brain)                                                                  | 1387179_at        |                | -1,61           | enzyme                     | Plasma Membrane     |
| Cellular processes -Death                 | AXIN2              | axin 2                                                                                       | 1387184_at        |                | -1,53           | other                      | Cytoplasm           |
| Cytoskeleton                              | EMD                | emerin                                                                                       | 1370017_at        |                | 1,66            | other                      | Nucleus             |
| Cytoskeleton                              | EPB41L3            | erythrocyte membrane protein band 4.1-like 3                                                 | 1370503_s_at      |                | -1,60           | other                      | Plasma Membrane     |
| Cytoskeleton                              | MAP6               | microtubule-associated protein 6                                                             | 1371087_a_at      |                | -1,52           | other                      | Cytoplasm           |
| Cytoskeleton                              | BAIAP2             | BAI1-associated protein 2                                                                    | 1374117_at        |                | 2,04            | kinase                     | Plasma Membrane     |
| Cytoskeleton                              | ACTG2              | actin, gamma 2, smooth muscle, enteric                                                       | 1386869_at        |                | ↗               | other                      | Cytoplasm           |
| Cytoskeleton                              | MYOC               | myocilin, trabecular meshwork inducible glucocorticoid response protein                      | 1387313_at        |                | ↗               | other                      | Cytoplasm           |
| Extracellular matrix                      | CTGF               | connective tissue growth factor                                                              | 1367631_at        |                | 2,13            | growth factor              | Extracellular Space |
| Extracellular matrix                      | MMP24              | matrix metalloproteinase 24 (membrane-inserted)                                              | 1368595_at        |                | 1,49            | peptidase                  | Extracellular Space |
| Extracellular matrix                      | FN1                | fibronectin 1                                                                                | 1370234_at        |                | 1,51            | enzyme                     | Plasma Membrane     |
| Extracellular matrix                      | VCAN               | versican                                                                                     | 1388054_a_at      |                | -2,15           | other                      | Extracellular Space |
| Extracellular matrix                      | EPHA7              | EPH receptor A7                                                                              | 1388061_a_at      |                | -1,90           | kinase                     | Plasma Membrane     |
| Extracellular matrix                      | LECT1              | leukocyte cell derived chemotaxin 1                                                          | 1387164_at        |                | ↗               | other                      | Extracellular Space |
| Immune response / Inflammation            | PLAT               | plasminogen activator, tissue                                                                | 1367800_at        |                | 2,20            | peptidase                  | Extracellular Space |
| Immune response / Inflammation            | SGK1               | serum/glucocorticoid regulated kinase 1                                                      | 1367802_at        |                | 2,13            | kinase                     | Cytoplasm           |
| Immune response / Inflammation            | TGFB3              | transforming growth factor, beta 3                                                           | 1367859_at        |                | 1,55            | growth factor              | Extracellular Space |
| Immune response / Inflammation            | SCG2               | secretogranin II (chromogranin C)                                                            | 1368044_at        |                | 1,86            | cytokine                   | Extracellular Space |
| Immune response / Inflammation            | ADAMTS1            | ADAM metalloproteinase with thrombospondin type 1 motif, 1                                   | 1368223_at        |                | 2,12            | peptidase                  | Extracellular Space |
| <b>Immune response / Inflammation</b>     | <b>PTGS2/ Cox2</b> | <b>prostaglandin-endoperoxide synthase 2 (prostaglandin G/H synthase and cyclooxygenase)</b> | <b>1368527_at</b> |                | <b>1,62</b>     | <b>enzyme</b>              | <b>Cytoplasm</b>    |
| Immune response / Inflammation            | ACVRL1             | activin A receptor type II-like 1                                                            | 1368553_at        |                | 1,81            | kinase                     | Plasma Membrane     |
| Immune response / Inflammation            | P2RY12             | purinergic receptor P2Y, G-protein coupled, 12                                               | 1368728_at        |                | -2,05           | G-protein coupled receptor | Plasma Membrane     |
| Immune response / Inflammation            | IL18BP             | interleukin 18 binding protein                                                               | 1369031_at        |                | 1,64            | other                      | Extracellular Space |
| Immune response / Inflammation            | CD47               | CD47 molecule                                                                                | 1369559_a_at      |                | -1,52           | other                      | Plasma Membrane     |
| Immune response / Inflammation            | SLC16A7            | solute carrier family 16, member 7 (monocarboxylic acid transporter)                         | 1370609_a_at      |                | -1,62           | transporter                | Plasma Membrane     |

| Family                                | Symbol      | Entrez Gene Name                                                                         | Affymetrix        | Fold Chge<br>GK11 | Fold Chge<br>MK801 | Type(s)<br>IPA classification | Location               |
|---------------------------------------|-------------|------------------------------------------------------------------------------------------|-------------------|-------------------|--------------------|-------------------------------|------------------------|
| Immune response / Inflammation        | SPON2       | spondin 2, extracellular matrix protein                                                  | 1370847_at        |                   | 1,96               | other                         | Extracellular Space    |
| Immune response / Inflammation        | SLC2A1      | solute carrier family 2 (facilitated glucose transporter), member 1                      | 1370848_at        |                   | 1,61               | transporter                   | Plasma Membrane        |
| <b>Immune response / Inflammation</b> | <b>NOS3</b> | <b>nitric oxide synthase 3 (endothelial cell)</b>                                        | <b>1371166_at</b> |                   | <b>1,89</b>        | <b>enzyme</b>                 | <b>Cytoplasm</b>       |
| Immune response / Inflammation        | GM5068      | predicted gene 5068                                                                      | 1375170_at        |                   | 1,82               | other                         | unknown                |
| <b>Immune response / Inflammation</b> | <b>IL6R</b> | <b>interleukin 6 receptor</b>                                                            | <b>1386987_at</b> |                   | <b>1,82</b>        | <b>transmembrane receptor</b> | <b>Plasma Membrane</b> |
| Immune response / Inflammation        | RGS2        | regulator of G-protein signaling 2, 24kDa                                                | 1387074_at        |                   | 1,58               | other                         | Nucleus                |
| Immune response / Inflammation        | NPR2        | natriuretic peptide receptor B/guanylate cyclase B (atrionatriuretic peptide receptor 2) | 1387099_at        |                   | 1,70               | G-protein coupled receptor    | Plasma Membrane        |
| Immune response / Inflammation        | IGFBP6      | insulin-like growth factor binding protein 6                                             | 1387625_at        |                   | -1,64              | other                         | Extracellular Space    |
| Immune response / Inflammation        | IFI27       | interferon, alpha-inducible protein 27                                                   | 1387770_at        |                   | -1,67              | other                         | Cytoplasm              |
| Immune response / Inflammation        | SLC9A3R2    | solute carrier family 9 (sodium/hydrogen exchanger), member 2                            | 1387976_at        |                   | 1,86               | transporter                   | Plasma Membrane        |
| Immune response / Inflammation        | TINAGL1     | tubulointerstitial nephritis antigen-like 1                                              | 1367650_at        |                   | ↗                  | transporter                   | Extracellular Space    |
| Immune response / Inflammation        | LTA         | lymphotoxin alpha (TNF superfamily, member 1)                                            | 1368722_at        |                   | ↗                  | cytokine                      | Extracellular Space    |
| Immune response / Inflammation        | ITGB7       | integrin, beta 7                                                                         | 1371106_at        |                   | ↗                  | transmembrane receptor        | Plasma Membrane        |
| Immune response / Inflammation        | PLA2G10     | phospholipase A2, group X                                                                | 1387250_at        |                   | ↗                  | enzyme                        | Cytoplasm              |
| Insuline signaling                    | RLN1        | relaxin 1                                                                                | 1368495_at        |                   | 1,60               | other                         | Extracellular Space    |
| Insuline signaling                    | IRS3        | insulin receptor substrate 3                                                             | 1368486_at        |                   | ↗                  | other                         | Nucleus                |
| Lipids metabolism                     | ACSL6       | acyl-CoA synthetase long-chain family member 6                                           | 1368182_at        |                   | -1,52              | enzyme                        | Cytoplasm              |
| Lipids metabolism                     | ASPA        | aspartoacylase (Canavan disease)                                                         | 1368563_at        |                   | 1,75               | enzyme                        | unknown                |
| Lipids metabolism                     | PAFAH1B2    | platelet-activating factor acetylhydrolase 1b, catalytic subunit 2                       | 1369641_at        |                   | 1,45               | enzyme                        | Cytoplasm              |
| Lipids metabolism                     | PEX5L       | peroxisomal biogenesis factor 5-like                                                     | 1370833_at        |                   | -1,49              | other                         | Cytoplasm              |
| Lipids metabolism                     | PPAP2B      | phosphatidic acid phosphatase type 2B                                                    | 1370950_at        |                   | -1,61              | phosphatase                   | Plasma Membrane        |
| Lipids metabolism                     | ACOX2       | acyl-Coenzyme A oxidase 2, branched chain                                                | 1371137_at        |                   | 1,70               | enzyme                        | Cytoplasm              |
| Lipids metabolism                     | SC5DL       | sterol-C5-desaturase (ERG3 delta-5-desaturase homolog, S. cerevisiae)                    | 1387926_at        |                   | 1,76               | enzyme                        | Cytoplasm              |
| Lipids metabolism                     | ACACA       | acetyl-Coenzyme A carboxylase alpha                                                      | 1387538_at        |                   | ↗                  | enzyme                        | Cytoplasm              |
| Response to stress / drug             | DUSP1       | dual specificity phosphatase 1                                                           | 1368146_at        |                   | 3,65               | phosphatase                   | Nucleus                |
| Response to stress / drug             | RTN3        | reticulon 3                                                                              | 1368807_at        |                   | 1,66               | other                         | Cytoplasm              |
| Response to stress / drug             | KCNJ12      | potassium inwardly-rectifying channel, subfamily J, member 12                            | 1369795_at        |                   | -1,66              | ion channel                   | Plasma Membrane        |
| Response to stress / drug             | STAT3       | signal transducer and activator of transcription 3 (acute-phase reactant)                | 1370224_at        |                   | 1,78               | transcription regulator       | Nucleus                |
| Response to stress / drug             | CA2         | carbonic anhydrase II                                                                    | 1386922_at        |                   | -1,47              | enzyme                        | Cytoplasm              |
| Response to stress / drug             | JUNB        | jun B proto-oncogene                                                                     | 1387788_at        |                   | 1,76               | transcription regulator       | Nucleus                |
| Response to stress / drug             | HYOU1       | hypoxia up-regulated 1                                                                   | 1370665_at        |                   | ↗                  | other                         | Cytoplasm              |
| Response to stress / drug             | CYP2C9      | cytochrome P450, family 2, subfamily C, polypeptide 9                                    | 1387328_at        |                   | ↗                  | enzyme                        | Cytoplasm              |
| Synapse remodelling                   | WIF1        | WNT inhibitory factor 1                                                                  | 1369203_at        |                   | 1,70               | other                         | Extracellular Space    |
| Synaptic transmission                 | NSF         | N-ethylmaleimide-sensitive factor                                                        | 1369690_at        |                   | -1,56              | transporter                   | Cytoplasm              |
| Synaptic transmission                 | CORT        | cortistatin                                                                              | 1387337_at        |                   | 1,58               | other                         | Extracellular Space    |
| Synaptic transmission                 | GRM3        | glutamate receptor, metabotropic 3                                                       | 1388189_at        |                   | -1,52              | G-protein coupled receptor    | Plasma Membrane        |
| Transcription factor                  | CITED2      | Cbp/p300-interacting transactivator, with Glu/Asp-rich carboxy-terminal domain 2         | 1367602_at        |                   | 2,28               | transcription regulator       | Nucleus                |

| Family               | Symbol   | Entrez Gene Name                                                       | Affymetrix   | Fold Chge GK11 | Fold Chge MK801 | Type(s) IPA classification        | Location            |
|----------------------|----------|------------------------------------------------------------------------|--------------|----------------|-----------------|-----------------------------------|---------------------|
| Transcription factor | TSC22D3  | TSC22 domain family, member 3                                          | 1367771_at   |                | 2,34            | transcription regulator           | Nucleus             |
| Transcription factor | EGR1     | early growth response 1                                                | 1368321_at   |                | -2,32           | transcription regulator           | Nucleus             |
| Transcription factor | USF2     | upstream transcription factor 2, c-fos interacting                     | 1368591_at   |                | -1,81           | transcription regulator           | Nucleus             |
| Transcription factor | ID2      | inhibitor of DNA binding 2, dominant negative helix-loop-helix protein | 1368870_at   |                | -1,52           | transcription regulator           | Nucleus             |
| Transcription factor | NR4A2    | nuclear receptor subfamily 4, group A, member 2                        | 1369007_at   |                | 2,25            | ligand-dependent nuclear receptor | Nucleus             |
| Transcription factor | FHL2     | four and a half LIM domains 2                                          | 1369313_at   |                | -1,85           | other                             | Nucleus             |
| Transcription factor | HOXA1    | homeobox A1                                                            | 1369544_a_at |                | 2,09            | transcription regulator           | Nucleus             |
| Transcription factor | PPARGC1A | peroxisome proliferator-activated receptor gamma, coactivator 1        | 1370089_at   |                | -2,10           | transcription regulator           | Nucleus             |
| Transcription factor | ZNF597   | zinc finger protein 597                                                | 1370705_at   |                | 1,56            | other                             | Nucleus             |
| Transcription factor | FHL2     | four and a half LIM domains 2                                          | 1371951_at   |                | -1,73           | other                             | Nucleus             |
| Transcription factor | NR4A1    | nuclear receptor subfamily 4, group A, member 1                        | 1386935_at   |                | 1,43            | ligand-dependent nuclear receptor | Nucleus             |
| Transcription factor | ID1      | inhibitor of DNA binding 1, dominant negative helix-loop-helix protein | 1387028_a_at |                | 1,47            | transcription regulator           | Nucleus             |
| Transcription factor | CEBPB    | CCAAT/enhancer binding protein (C/EBP), beta                           | 1387087_at   |                | 3,86            | transcription regulator           | Nucleus             |
| Transcription factor | ZRANB2   | zinc finger, RAN-binding domain containing 2                           | 1387117_at   |                | -1,65           | transcription regulator           | Nucleus             |
| Transcription factor | PHOX2A   | paired-like homeobox 2a                                                | 1387238_at   |                | 2,10            | transcription regulator           | Nucleus             |
| Transcription factor | EGR2     | early growth response 2                                                | 1387306_a_at |                | -1,69           | transcription regulator           | Nucleus             |
| Transcription factor | CEBPD    | CCAAT/enhancer binding protein (C/EBP), delta                          | 1387343_at   |                | 1,64            | transcription regulator           | Nucleus             |
| Transcription factor | EGR4     | early growth response 4                                                | 1387442_at   |                | 1,57            | transcription regulator           | Nucleus             |
| Transcription factor | FST      | follicle-stimulating hormone receptor                                  | 1387843_at   |                | -1,69           | other                             | Extracellular Space |
| Transcription factor | ZFP36    | zinc finger protein 36, C3H type, homolog (mouse)                      | 1387870_at   |                | 2,08            | transcription regulator           | Nucleus             |
| Transcription factor | MAFB     | v-maf musculoaponeurotic fibrosarcoma oncogene homolog B               | 1387947_at   |                | 1,63            | other                             | Nucleus             |
| Transcription factor | PRPF18   | PRP18 pre-mRNA processing factor 18 homolog (S. cerevisiae)            | 1388005_at   |                | 1,92            | transporter                       | Nucleus             |
| Transcription factor | NR4A3    | nuclear receptor subfamily 4, group A, member 3                        | 1369217_at   |                | ↗               | ligand-dependent nuclear receptor | Nucleus             |
| Transcription factor | KLF4     | Kruppel-like factor 4 (gut)                                            | 1387260_at   |                | ↗               | transcription regulator           | Nucleus             |
| Transcription factor | FOSL2    | FOS-like antigen 2                                                     | 1387530_a_at |                | ↗               | transcription regulator           | Nucleus             |
| Other / Unknown      | IFRD1    | interferon-related developmental regulator 1                           | 1367795_at   |                | 2,00            | other                             | Nucleus             |
| Other / Unknown      | CP       | ceruloplasmin (ferroxidase)                                            | 1368420_at   |                | 1,56            | enzyme                            | Extracellular Space |
| Other / Unknown      | KPNB1    | karyopherin (importin) beta 1                                          | 1368573_at   |                | -1,81           | transporter                       | Nucleus             |
| Other / Unknown      | CYP1B1   | cytochrome P450, family 1, subfamily B, polypeptide 1                  | 1368990_at   |                | 1,61            | enzyme                            | Cytoplasm           |
| Other / Unknown      | SLC5A5   | solute carrier family 5 (sodium iodide symporter), member 5            | 1369020_at   |                | 1,63            | transporter                       | Plasma Membrane     |
| Other / Unknown      | SC65     | synaptonemal complex protein SC65                                      | 1369805_at   |                | 1,78            | other                             | Nucleus             |
| Other / Unknown      | PORF1    | preoptic regulatory factor 1                                           | 1369885_at   |                | 2,05            | other                             | Extracellular Space |
| Other / Unknown      | C5ORF62  | chromosome 5 open reading frame 62                                     | 1370408_at   |                | 1,43            | ion channel                       | unknown             |
| Other / Unknown      | SCAMP1   | secretory carrier membrane protein 1                                   | 1370978_at   |                | -1,57           | transporter                       | Cytoplasm           |
| Other / Unknown      | SCAPER   | S-phase cyclin A-associated protein in the ER                          | 1371093_at   |                | -1,46           | other                             | unknown             |
| Other / Unknown      | SLC14A2  | solute carrier family 14 (urea transporter), member 2                  | 1371205_at   |                | 1,66            | transporter                       | Plasma Membrane     |
| Other / Unknown      | PC       | pyruvate carboxylase                                                   | 1386917_at   |                | 1,94            | enzyme                            | Cytoplasm           |

| Family          | Symbol   | Entrez Gene Name                                    | Affymetrix   | Fold Chge<br>GK11 | Fold Chge<br>MK801 | Type(s)<br>IPA classification | Location        |
|-----------------|----------|-----------------------------------------------------|--------------|-------------------|--------------------|-------------------------------|-----------------|
| Other / Unknown | GUCY1A3  | guanylate cyclase 1, soluble, alpha 3               | 1387079_at   |                   | -1,64              | enzyme                        | Cytoplasm       |
| Other / Unknown | CBS      | cystathionine-beta-synthase                         | 1387178_a_at |                   | 1,73               | enzyme                        | Cytoplasm       |
| Other / Unknown | KCNV1    | potassium channel, subfamily V, member 1            | 1387881_at   |                   | -1,84              | ion channel                   | unknown         |
| Other / Unknown | SLC22A24 | solute carrier family 22, member 24                 | 1388172_at   |                   | 1,86               | transporter                   | unknown         |
| Other / Unknown | VPS52    | vacuolar protein sorting 52 homolog (S. cerevisiae) | 1369668_x_at |                   | ↗                  | other                         | Cytoplasm       |
| Other / Unknown | HTR5B    | 5-hydroxytryptamine (serotonin) receptor 5B         | 1388219_at   |                   | ↗                  | G-protein coupled receptor    | Plasma Membrane |
